# Supplementary material
Source: publisher figshare collection journal article supplement (https://acs.figshare.com/ndownloader/files/14030909)
Supplement: Supplementary file 1 [file 14030909]

## Supporting Information

# The 0D Cs<sub>2</sub>TeI<sub>6</sub> Perovskite: Solution Processed Thick Films with High X-Ray Sensitivity

Yadong Xu<sup>†, ‡</sup>, Bo Jiao<sup>‡</sup>, Tze-Bin Song<sup>‡</sup>, Constantinos C. Stoumpos<sup>‡</sup>, Yihui He<sup>‡</sup>, Ido Hadar<sup>‡</sup>, Wenwen Lin<sup>‡</sup>, Wanqi Jie<sup>†</sup>, Mercouri G. Kanatzidis<sup>‡, §, \*</sup>

<sup>†</sup>State Key Laboratory of Solidification Processing, Northwestern Polytechnical University, Xi'an 710072, China, <sup>‡</sup>Department of Chemistry, and <sup>§</sup>Department of Materials Science and Engineering, Northwestern University, Evanston, 60208

## Synthesis of $\text{TeI}_4$

Elemental Te (99.999% wt.) and  $\text{I}_2$  (99.999% wt.) with the ratio of 1:2 were loaded into a fused silica ampoule with an inner diameter of 10 mm and sealed under a vacuum of  $5 \times 10^{-2}$  Pa. The sealed samples were heated to 170 °C over 10 h and held at the maximum temperature (300 °C) for 48 h before cooling to room temperature. Then the resulting dark gray ( $\text{TeI}_4$ ) products, as confirmed by powder X-ray diffraction, were ground and stored in a nitrogen-filled glovebox for further use.

## Characterization

Powder X-ray diffraction data (XRD) were collected on a Rigaku MiniFlex600 X-ray diffractometer ( $\text{Cu K}\alpha$ , 1.5406 Å) operating at 40 kV and 20 mA. Both Hitachi 4800 and 8030 SEM instrument was used for surface morphology observation. Simultaneously, the chemical compositions of local areas in  $\text{Cs}_2\text{TeI}_6$  films were characterized using energy dispersive spectrometer (EDS) analysis. Transmittance of the perovskite films was obtained from 300 to 1200 nm at room temperature using a Shimadzu UV-3600 PC double-beam, double-monochromator spectrophotometer. X-ray photoelectron spectroscopy (XPS) measurements were carried out on an Omicron ESCA Probe XPS spectrometer (Thermo Scientific ESCALAB 250Xi) using 150 eV pass energy and 1 eV step size for survey scan and 50 eV pass energy and 0.05 eV step size for band edge scan. Surface etching was performed by Ar-ion sputtering with 3 keV accelerating for 10 seconds.

Current-voltage (I-V) curves were measured at room temperature using a Keithley 6517b picoammeter/voltage supply under both low and high bias. The photosensitivity was conducted using a custom-made setup. The multilayer device was put inside a guarded dark box. Then the device was exposed to either ambient visible light or 473 nm laser source ( $30 \text{ mW}\cdot\text{cm}^{-2}$ , 1.2 mm laser spot diameter) with an ON-OFF state. The current- time (I-t) was obtained by Keithley 6517b. In addition, current density-voltage ( $J$ - $V$ ) characteristics of the devices were measured in air under 1 sun illumination (AM1.5G,  $100 \text{ mW}\cdot\text{cm}^{-2}$ ) using a certified solar simulator (Abet Technologies) and Keithley 2400 source meter. For X-ray response measurements,  $\text{Cs}_2\text{TeI}_6$  detectors were exposed to an X-ray source (Amptek Mini-X X-ray tube system with a silver target) with the low dose rate of  $0.2\text{-}2 \text{ R}\cdot\text{min}^{-1}$ . X-rays from the source were collimated using a brass cylinder with a 2-mm-diameter circular central bore. The source-to-detector distance was 5 cm. The X-ray intensity was modulated by adjusting the tube bias and current. The induced photocurrent signal of the detector was recorded as a function of time using a Keithley 6517b.

### Synthesis and growth of $\text{Cs}_2\text{TeI}_6$ bulk crystal

The  $\text{Cs}_2\text{TeI}_6$  crystals were synthesized from  $\text{TeI}_4$  (mentioned above) and  $\text{CsI}$  (Sigma-Aldrich, 99.9%). The carbon coating silica ampoules were used for synthesis and crystal growth. The starting materials were sealed under a vacuum of  $\sim 10^{-4}$  torr and heated at 610 °C for 24 h. The polycrystalline samples were directly subjected to crystal growth in a modified vertical two-zone Bridgman furnace equipped with a computer controlled linear stage. The temperature of the hot zone was 630 °C, while the cold zone was 450°C. The crystal growth was carried out with a lowering rate of 0.5 mm per hour. After the crystal growth, black  $\text{Cs}_2\text{TeI}_6$  ingots 10 mm in diameter and 60 mm in length were obtained.

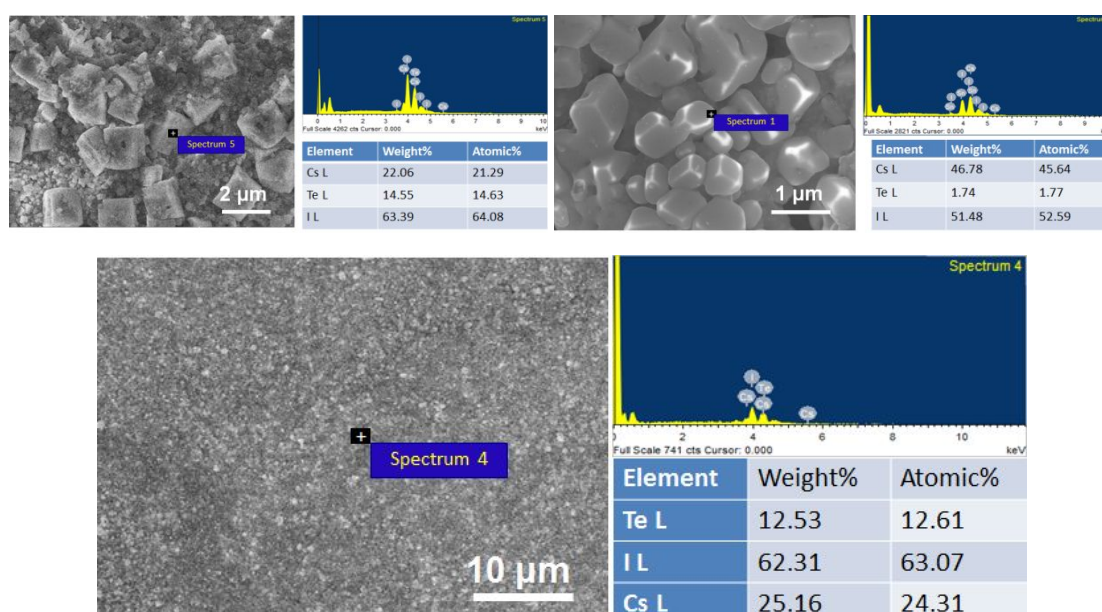

**Figure S1.** Composition measurements for  $\text{Cs}_2\text{TeI}_6$  films using SEM-EDS.

**Table 1. E-spray parameters for  $\text{Cs}_2\text{TeI}_6$  thick film.**

| Organic solvents | Substrate temperature / $^{\circ}\text{C}$ | DC bias /KV | Substrate-nozzle distance $D_{\text{sn}}$ /cm | Spray rate / $\text{mL}\cdot\text{h}^{-1}$ |
|------------------|--------------------------------------------|-------------|-----------------------------------------------|--------------------------------------------|
| DMF: Ethanol     | 160                                        | 15          | 7.5                                           | 1.2                                        |

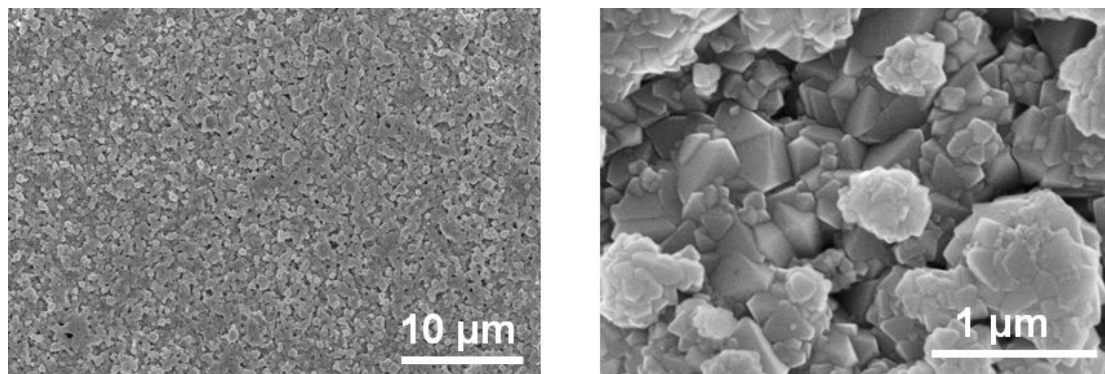

**Figure S2.** SEM images of  $\text{Cs}_2\text{TeI}_6$  films when the solvent evaporated rapidly, nano size clusters are formed.

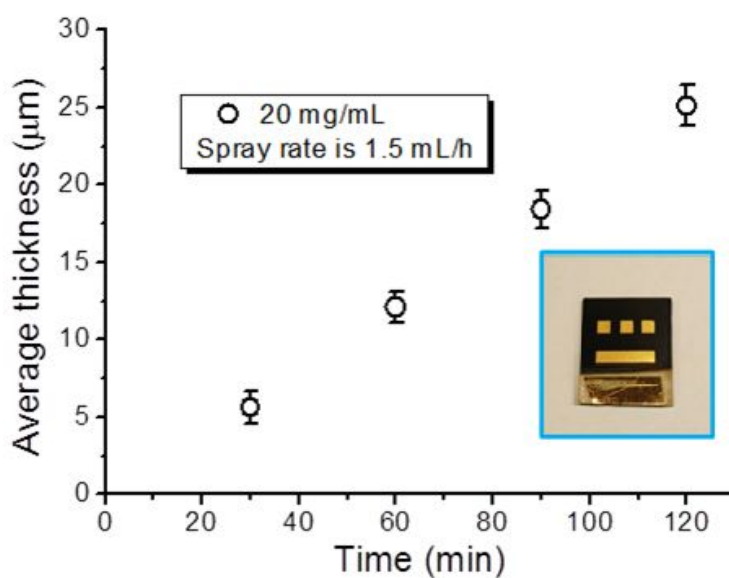

**Figure S3.** Average thickness of  $\text{Cs}_2\text{TeI}_6$  films as a function of spray time. Inset is a completed multilayer  $\text{Cs}_2\text{TeI}_6$  device.

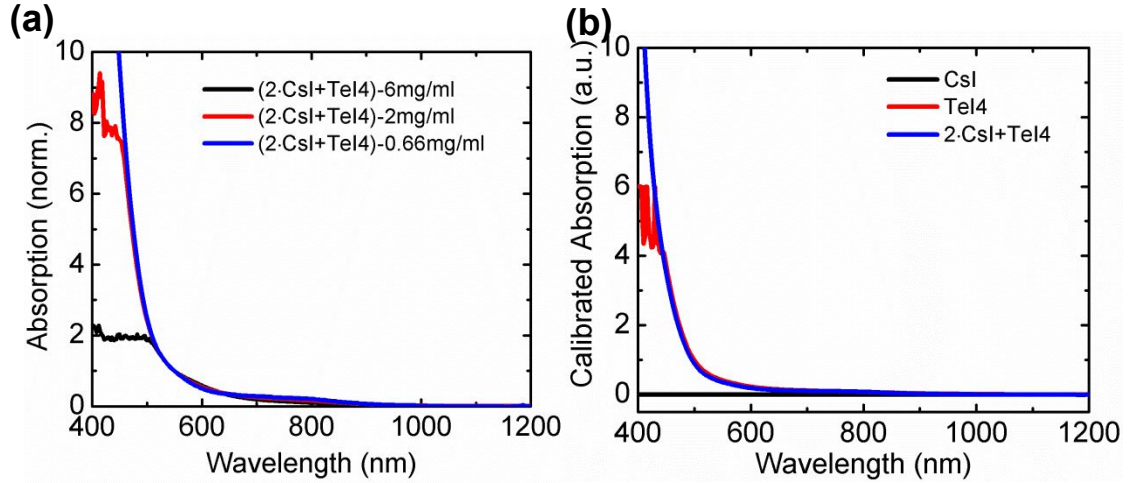

**Figure S4.** Absorption spectra of the  $\text{Cs}_2\text{TeI}_6$  precursor solution. (a) Absorption spectra of  $\text{Cs}_2\text{TeI}_6$  precursor solution at different concentrations (normalized at 550 nm), showing significant blue shift of the absorption with respect to  $\text{Cs}_2\text{TeI}_6$  absorption. (b) Absorption spectra of  $\text{Cs}_2\text{TeI}_6$  precursor solution, and each precursor absorption. The  $\text{Cs}_2\text{TeI}_6$  precursor absorption is comparable with the  $\text{TeI}_4$  absorption, indicating nano size  $\text{Cs}_2\text{TeI}_6$  precipitates were not formed in the solution. The  $\text{CsI}$  solution shows no absorption at the visible range and it is also transparent by eye (also at high concentrations).

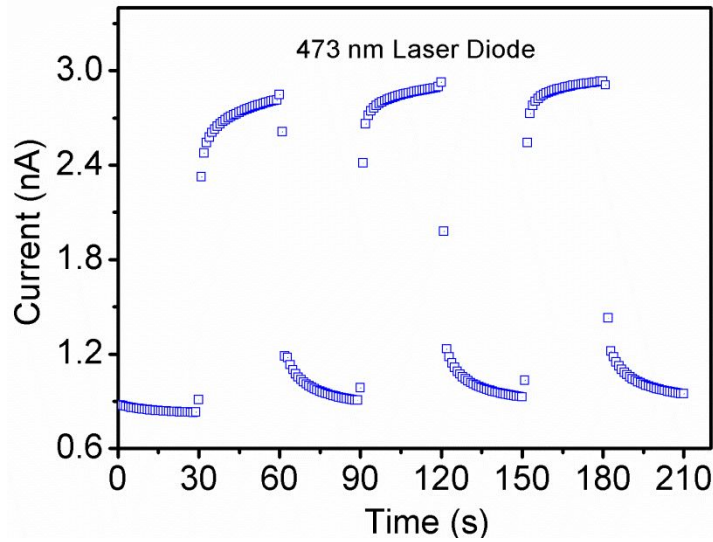

**Figure S5.** Steady-state I-V measurements under applied electric field of  $400 \text{ V} \cdot \text{cm}^{-1}$ , illuminated by a 473 nm laser diode, with bias applied to the FTO contact.

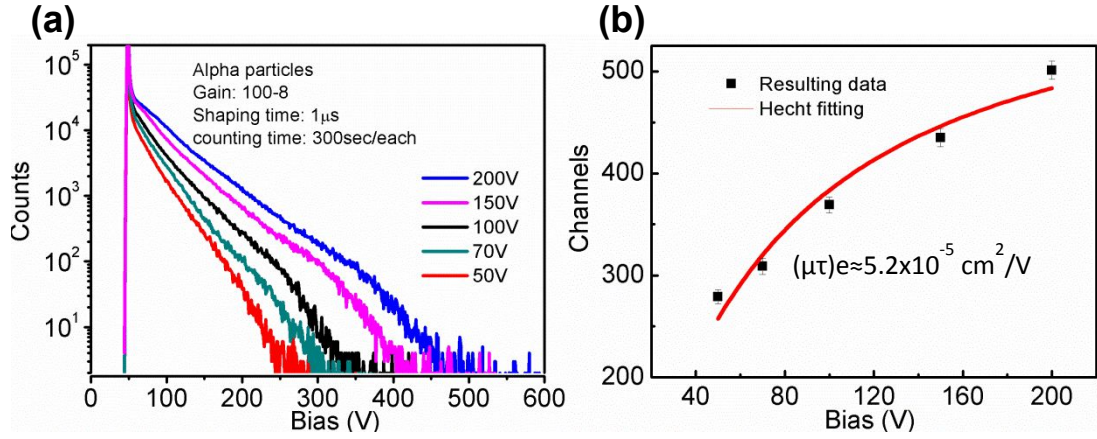

**Figure S6.** Alpha response of  $\text{Cs}_2\text{TeI}_6$  bulk crystals obtained by vertical Bridgman method. (a) After wafer processing and device fabrication,  $\alpha$  particle induced pulse height spectra was measured using an un-collimated  $^{241}\text{Am}$  (5.48 MeV) radioactive source at room temperature. The electron mobility lifetime products  $(\mu\tau)_e$  of the  $\text{Cs}_2\text{TeI}_6$  crystals were expected by fitting the plots of photo-peak position vs electrical field strength using the single carrier Hecht equation.

$$CCE \approx \frac{\mu\tau V}{d^2} \left[ 1 - \exp\left(-\frac{d^2}{\mu\tau V}\right) \right] \quad (1)$$

where  $CCE$  is the charge collection efficiency,  $\mu$  and  $\tau$  are the carrier mobility and lifetime, respectively.  $D$  is the sample thickness.  $V$  is the applied electrical bias. (b) A  $(\mu\tau)_e$  value of  $5.2 \times 10^{-5} \text{ cm}^2 \text{V}^{-1}$  was obtained for the as-grown  $\text{Cs}_2\text{TeI}_6$  crystals.

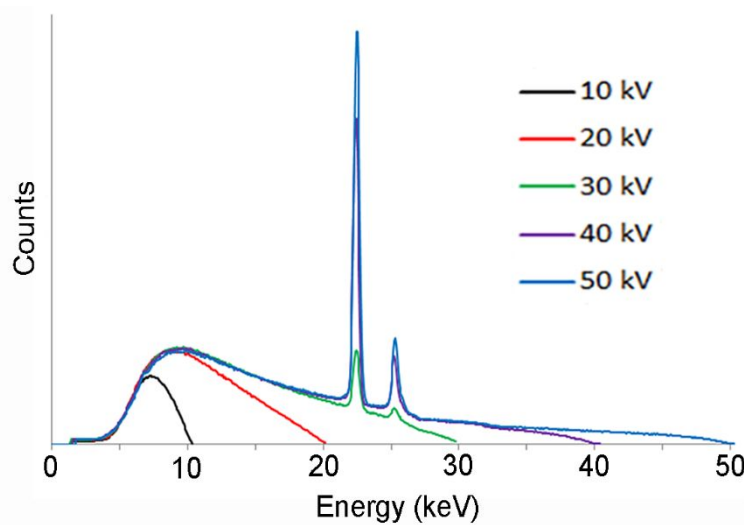

**Figure S7.** Mini-X silver (Ag) output spectrum at 10, 20, 30, 40 and 50 kVp, from Amptek, Inc. <http://amptek.com/products/mini-x-ray-tube/>

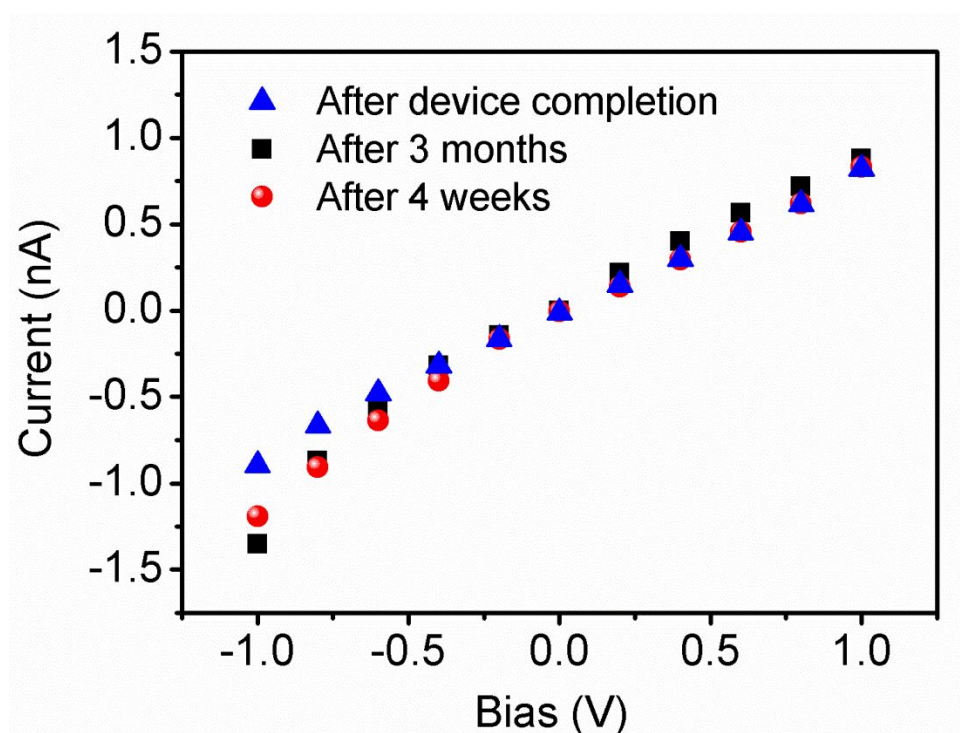

**Figure S8.** Room-temperature I-V characteristics over a period of 3 months for a 25- $\mu\text{m}$ -thick planar  $\text{Cs}_2\text{TeI}_6$  device under applied electric field of  $400 \text{ V}\cdot\text{cm}^{-1}$ .
